# Supplementary material for: Towards the routine use of in silico screenings for drug discovery using metabolic modelling
Source: Biochem Soc Trans. 2020 May 5;48(3):955–69. doi: 10.1042/BST20190867 (PMC7329353; doi:10.1042/BST20190867)
Supplement: Supplementary Tables S1-S7 [file BST-48-955-s1.pdf]

## Sheet: Overview
	Table1	Model-building algorithms	Overview on the different model-building algorithms
	Table2	Cancer models	Metabolic cancer models
	Table3	Gene expression in tissues	Gene expression in tissues
	Table4	Cancer gene information	information on genes related to cancer
	Table5	Disease genes	databases associating genes and related information to diseases
	Table6	Essential gene screenings	available essential gene screenings for humans
	Table7	Datasets	Public datasets on normal human tissues and cancer tissues

## Sheet: Table1 ModelBuildingAlgorithms
Algorithm	Strategy	Reference	Link
FASTCORE	Builds a compact context-specific model by adding the minimal number of reactions not supported by the data to a set of core reactions (reactions with a high confidence level that are active in the context of interest) to obtain a consistent model.	(Vlassis et al., 2014)	https://journals.plos.org/ploscompbiol/article?id=10.1371/journal.pcbi.1003424
FASTCORMICS	Workflow derived from FASTCORE that uses Barcode to discretize microarray gene expression data into expressed, not expressed, and undetermined. Reactions under the control of inactive genes are removed, whereas reactions under the control of expressed genes form the core reaction set. Reactions that are associated to genes with undetermined expression state are only included if necessary to obtai…	(Pires Pacheco et al., 2015)	https://link.springer.com/article/10.1186/s12864-015-1984-4
rFASTCORMICS	Workflow derived from FASTCORMICS that uses the gene expression distribution of each sample to discretize RNA-seq data into expressed, not expressed, and undetermined. FASTCORMICS is then run as described above.	(Pires Pacheco et al., 2019)	https://www.sciencedirect.com/science/article/pii/S2352396419302853
CORDA	CORDA assigns penalisation weights to reactions in function of their confidence level (defined by the user) by adding pseudo-metabolites to the model. There are 4 different categories: high (HC), medium (MC), negative (NC) confidence for reactions that are under the control of inactive genes and other reactions (OT, reactions for which the information is missing or reactions that are not under ge…	(Shultz et al., 2016)	https://journals.plos.org/ploscompbiol/article?id=10.1371/journal.pcbi.1004808
INIT	INIT was originally tailored to take the proteome data from the Human Protein Atlas but some versions can also take RNA-seq data as input. INIT allows a small accumulation of metabolites at the steady state (S*v>0), where S is the stoichiometric matrix and v the vector of reaction rates. The net production of metabolites is then used as weights for the optimization.	(Agren et al., 2012)	https://journals.plos.org/ploscompbiol/article?id=10.1371/journal.pcbi.1002518
IMAT	IMAT takes as input expression data that is discretized into low, moderate, or high expression. IMAT then searches for a flux distribution that is the most consistent with the input expression data.	(Zur et al., 2010)	https://academic.oup.com/bioinformatics/article/26/24/3140/290045
MBA	MBA and FASTCORE are part of the same family of algorithms that aim to complement a set of reactions with a high confidence level with a minimal number of reactions with low or no confidence. Even if the strategy is the same, MBA uses a pruning approach, whereas FASTCORE uses a core expanding strategy that makes the FASTORE algorithm several orders magnitude faster than its competitors.	(Jerby et al., 2010)	https://www.embopress.org/doi/full/10.1038/msb.2010.56
GIMME	Gimme optimizes for a biological function such i.e. growth while minimizing the inclusion of inactive reactions.	(Becker et al., 2008)	https://journals.plos.org/ploscompbiol/article?id=10.1371/journal.pcbi.1000082
PRIME	Unlike the others algorithm in this list, PRIME is not a subnetwork-extraction algorithm but modifies the bounds of the reactions in the input model in function of the expression values of the associated genes . Like Gimme, PRIME requires an optimization function and therefore, for human model, it is mainly applied to cancer.	(Yizhaket al., 2014	https://elifesciences.org/articles/03641
mCADRE	mCADRE is part is the same family of algorithms than FASTCORE and MBA. Similar to MBA, it uses a pruning strategy but, unlike its predecessor, it does not use a random pruning, which allows to decrease the computational time to hours. However, it is far slower than FASTORE that has model-building times of seconds to minutes	(Wang et al., 2012)	https://bmcsystbiol.biomedcentral.com/articles/10.1186/1752-0509-6-1
RegrEX	RegrEx tries to balance between the goodness of the fit of the predicted flux distribution to the measured expression data, and the complexity of the model (by reducing the number of features). To this aim, RegrEx added a L1-norm regularization that must be determined by parameter tuning using cross-validation.	(Esteves et al., 2015)	https://journals.plos.org/plosone/article?id=10.1371/journal.pone.0131875

## Sheet: Table2 Cancer Models
Year	Origin Tissue	Input model	type of input data	algorithm	Findings	Scope	Reference
2010	Growth kinetics from the Hela cell line	published knowledge basic thermodynamics compartmentalization information		manual	simulation of cancer cell growth potential target enzymes (PGMT, ENO,GAPD,PYK,LDH)	glycolysis TCA cycle pentose phosphate glutaminolysis oxidative phosphorylation	(Resendis-Antonio et al., 2010)
2010	General model	general reduced flux balance model of ATP generation		manual	aerobic glycolysis is energetically favourable for proliferating cells	glycolysis mitochondrial respiration biosynthesis of precursors from glucose	(Vazquez et al., 2010)
2010	NCI60 cancer cell lines	Recon 1	Gene expression data (mRNA)	network-based method (Schlomi et al., 2008)	creation of a drug-reaction network prediction of new possible enzyme targets for known cancer drugs	genome scale	(Li et al., 2010)
2011	General model	Recon 1 with added pseudo biomass reaction and enzyme solvent constraints	human enzyme catalytic rates	manual	maximization of the biomass production in regard to solvent capacity prediction of three different growth phases high glutamine uptake favours proliferation	genome scale	(Shlomi et al., 2011)
2011	NCI60 cancer cell lines	Recon 1	Gene expression data (mRNA)	manual and MBA variant	consistent model of cancer metabolism model of non-small cell lung cancer metabolism prediction of 52 cytostatic metabolic drug targets synthetic lethality testing	genome scale context-specific	(Folger et al., 2011)
2011	FH1 deficient kidney mouse cells○ HLRCC	Recon 1	Gene expression data (mRNA)	manual and MBA variant	genome-scale model of FH metabolism inhibition of Hmox is synthetically lethal in FH1 deficient cells	genome scale context-specific	(Frezza et al., 2011)
2012	16 cancer cell lines (69 healthy cell lines)	HMR	HPA and gene expression data our	INIT	identification of metabolic features in cancer	genome scale	(Agren et al., 2012)
2012	26 tumour tissues (100 healthy cell lines)	Recon 1	gene expression data metabolic network topology	mCadre	enriched pathways in cancer: (folate, eicosanoid, fatty acid, nucleotide metabolism) potential drug targets in the eicosanoid pathway	genome scale	(Wang et al., 2012)
2012	clinical breast cancer samples	Recon 1	transcriptomics or proteomics data within	MPA	prediction of breast cancer biomarkers metabolic differences between cancer sub-types	genome scale	(Jerby et al., 2012)
2012	from (Folger et al., 2011)	from (Folger et al., 2011)	from (Folger et al., 2011)	from (Folger et al., 2011)	algorithm for the in silico prediction of drug synergism with minimal side effects	genome scale	(Facchetti et al., 2012)
2013	liver cancer cells (HepG2)	Recon1	gene expression levels	iMAT	p53 regulates the glucose metabolism by promoting glucose secretion, enhancing gluconeogenesis and glucose production	genome scale	(Goldstein et al., 2013)
2013	NCI60 cancer cell lines	Recon 1 with added reactions	proliferations rates cell volume DNA content exchange fluxes	manual	link between proliferations rates, cell size and protein synthesis fast proliferating small cells (hyperplastic) with low protein synthesis rates per cell slowly proliferating large cells (hypertrophic) with high protein synthesis rates	genome scale	(Dolfi et al., 2013)
2013	colorectal carcinoma and breast adenocarcinoma	EHMN	metabolic data	network mapping	metabolic pathways to sustain tumour survival at low oxygen levels links between metabolites and hypoxia	genome scale	(Kotze et al., 2013)
2013	15 cancer cell types	from (Agren et al., 2012)			relationship between network controllability, topological parameters, and network medicine	genome scale	(Asgari et al., 2013)
2013	NCI60 cancer cell lines	Recon 2 HMR	Gene expression data (mRNA)	no name	identification of metabolic sub-networks in cancer growth associated metabolic networks increased rate of fatty acid synthesis but also an increased degradation of very diverse fatty acids producing hydro- gen peroxide or other compounds inducing oxidative stress and inflammation	genome scale	(Feizi and Bordel, 2013)
2014	six HCC samples from patients generic HCC model	HMR 2.0	proteomics data	tINIT	prediction of antimetabolites in HCC patient specific antimetabolites	genome scale	(Agren et al., 2014)
2014	NCI60 cancer cell lines	Recon 1	Gene expression data (mRNA)	PRIME	study of cancer migration with link to the Warburg effect target genes to reduce cancer migration but not proliferation	genome scale	(Yizhak et al., 2014b)
2014	NCI60 cancer cell lines lympho- blast cell lines (HapMap) breast and lung cancer biopsies	Recon 1	Gene e+D19:T19 (mRNA)	PRIME	prediction of drug targets which inhibit cancer proliferation focus on MLYCD	genome scale	(Yizhak et al., 2014a)
2014	clear cell renal cell carcinoma (ccRCC)	(Gamez-Pozo et al., 2017)	proteomics evidence	INIT	loss of heterozygosity hallmarked by VHL deletion in ccRCC may uniquely shape tumor metabolism	genome scale	(Gatto et al., 2014)
2014	generic/iBMK cell line	Recon 1	steady-state growth rate biomass composition Metabolite uptake and excretion rates	manual	role of NADPH in proliferating cells	genome scale	(Fan et al., 2014)
2014	9 different cancers: breast, kidney, and squamous cell carcinoma lung cancer from TCGA gastric, leukemia, liver, adenocarcinoma lung, ovarian, and pancreas cancer from different GEO datasets	Recon 2	exome mutation gene expression data	present/absent calls of enzymatic genes	oncometabolite prediction from loss-of-function mutations gain-of-function mutations	genome scale	(Nam et al., 2014)
2014	human hepatocellular carcinoma	Recon 1	gene expression data from(Schlomi et al.,2008)	no name	prediction of miRNA ability to reduce cancer growth miRNAs can inhibit metastasis and cancer progression through specific metabolic functions miRNAs as a therapy for cancer	genome scale	(Wu and Chan, 2014)
2014	4 high-throughput datasets and publications (81 tumor suppressor genes and 141 oncogenes)	Recon 1	data on oncogenes and tumor suppressor genes	manual mapping	predict the metabolic phenotypes of cancer cells	generic cancer model	(Hadi and Marashi, 2014)
2014	non-small cell lung cancers (40 adenocarcinoma and 18 squamous-cell carcinoma)	5875 EFMs from Recon 1	gene expression data	manual mapping	method to identify key elementary flux modes		(Rezola et al., 2014)
2015	11 human cancer cell lines of diverse tissue origin	HMR 2.0	gene expression RNA-seq	tINIT	prediction of 85 antimetabolites in cancer		(Ghaffari et al., 2015)
2015	361 HCC tumor samples from the TCGA	HMR2	gene expression data RNA-seq	tINIT	consensus GEM of HCC (iHCC2578) identification of metabolic alterations in HCC: liponeogenesis, gluconeogenesis, fatty acid biosynthesis		(Bjornson et al., 2015)
2015	TCGA data (min 15 healthy and cancer)	Recon 1	gene expression data RNA-seq	manual mapping	SDL are associated to smaller tumour size and patient survival		(Megchelenbrink et al., 2015)
2015	13 cancer cells	Recon 1	Gene expression data (mRNA)	E-Flux	Cancer types have similar distribution of metabolic changes identification of altered fluxes in cancer models 7 subsystems are the basis of the Warburg effect		(Asgari et al., 2015)
2015	prostate adenocarcinoma	HMR	proteomics evidence	INIT same pipeline as (Gatto et al., 2014)	prediction of essential genes in ccRcc and identification of 5 indispensable metabolic genes (AGPAT6, GALT, GCLC, GSS, and RRM2B) FBA predictions for PC were not coherent, suggesting that PC does not rely on biomass production as reported previously		(Gatto et al., 2015)
2015	glioblastoma cells	using rBionet and data from Expasy enzyme and KEGG		manual	insight into the metabolism of glioblastoma identification of drug targets via single and double gene deletions		(Bhowmick et al., 2015)
2016	174 cancer cell lines from the Cancer Cell Line Encyclopedia (CCLE)	Recon 2	gene expression data microarray data	"fastReconstructionAlgorithm"	identification of cancer specific metabolic essential genes		(Tobalina et al., 2016)
2016	20 cancer tissues	Recon 2	proteomic data from HPA	CORDA	creation of a model library to: differentially expressed pathways and metabolism up-regulation of folate metabolism, down-regulation of thiamine metabolism, and tight regulation of oxidative phosphorylation		(Schultz and Qutub, 2016)
2016	Liver, Breast, Lung Cancer	from (Agren et al., 2012) based on HMR	information on cancer cell growth and proliferation transport and exchange reactions	manually curation	Cancer and control models show differences in flux distribution Cancer models are more heterogeneous than the controls Reversal of tumour phenotype by "in silico" inhibitions	core models including reactions for cancer cell growth and proliferation transport and exchange reactions "glycolysis, pentose phosphate pathway (PPP), tricarboxylic acid cycle (TCA cycle), oxidative phosphorylation, glutamine metabolism, amino acid synthesis, urea cycle, folate metabolism and palmitate synthesis."	(Di Filippo et al., 2016)
2016	2000 breast cancer samples	Recon 2	Metabric transcriptome data	GEBRA	discovery of a novel poor prognosis cluster linked to serotonin production		(Leoncikas et al., 2016)
2016	glioblastoma multiforme	genome-scale brain metabolic model (iMS570) modified with biomass reaction	gene expression data	GIMME and MADE	prediction of flux distributions in glycolysis, glutaminolysis, TCA cycle and lipid metabolism	central	(Ozcan and Cakir, 2016)
2016	hybridoma cell line			manual	profiles of the major precursor and cofactor requirements for biomass synthesis on both mass and stoichiometric bases		(Keibler et al., 2016)
2016	pediatric leukemia	Recon 1	proteomic data from HPA	CORDA2	algorithm presentation		(Schultz et al., 2017)
2017	4 cancer cell lines (A375, HL60, KBM7, and K562)	Recon 1 (with and without biomass) Recon 2.2	RNA-seq data	6 different algorithms	Benchmarking on the different algorithms Assessment of the model performance and predictions		(Opdam et al., 2017)
2017	liver cancer cells (HepG2)	Recon 1	proteomics data from HPA gene expression data	4 different algorithms	Benchmarking on the four algorithms based on the data source new information on liver metabolism		(Ferreira et al., 2017)
2017		Recon 2	Proteomics data	E-Flux algorithm			(Gamez-Pozo et al., 2017)
2017	Liver cancer stem cells	HMR 2.0	gene expression RNAseq	tINIT	identification of metabolic characteristics of LCSCs		(Hur et al., 2017)
2018	prostate cancer cell line	Recon 2	transcriptomic data (microarrays)	iMAT	metabolic reprogramming in long-chain fatty acids metabolism		(Marin de Mas et al., 2018)
2018		Recon 2.2	microarray		effect of circadian rhythm genes on metabolism of colorectal cancer		(Fuhr et al., 2018)
2019	10005 samples from TCGA	Recon 2	RNA-seq data	rFASTCORMICS			(Pacheco et al., 2019)
2019	Generic COAD model from TCGA	Recon 2	RNA-seq data		Combined COAD model with LGG, LGG together with high fiber diet is beneficial for colorectal cancer patients		(Greenhalgh et al., 2019)
2019		iCancerCore			Prostate cancer GEM		(Turanli et al., 2019)
2018	50 HCC patient samples and 50 non-cancerous samples	HMR 2.0	RNA-seq data	tINIT	Prediction of 74 non-toxic anticancer metabolites targeting 3 genes Validation in HepG2 and Hep3B cells ranking of candidate targets for HCC according to biological network functionality		(Bidkhori et al., 2018)

## Sheet: Table3 Gene Expression Tissues
Name	Description	Website	Reference
BioGPS	Gene annotation portal with expression across different cell lines and species	http://biogps.org/	(Wu et al., 2016)
Expression Atlas	Gene expression across species and conditions	https://www.ebi.ac.uk/gxa/home	(Petryszak et al., 2016)
GENT2	Gene Expression database of Normal and Tumor tissues	http://gent2.appex.kr/	(Park et al., 2019)
GEPIA: Gene Expression Profiling Interactive Analysis	Visualization of the gene expression data from TCGA and GTEx	http://gepia.cancer-pku.cn/	(Tang et al., 2017)
GTExPortal	Gene expression across tissues	https://www.gtexportal.org/home/	(Ardlie et al., 2015)
Harmonizome	Gene expression across datasets and tissues	http://amp.pharm.mssm.edu/Harmonizome/	(Rouillard et al., 2016)
IGSR: The International Genome Sample Resource	Catalogue human genotype variation	http://www.internationalgenome.org/	(Auton et al., 2015)
The Human Protein Atlas	transcriptome data across tissues	http://www.proteinatlas.org/humanproteome	(Uhlen et al., 2015)
Tissue expression database	Weekly updated database for datamining using Brenda Tissue Ontology terms	https://tissues.jensenlab.org/Search	(Palasca et al., 2018)

## Sheet: Table4 Cancer Gene Information
Name	Description	0	Reference
Cancer Genetics WEB	Gene-Cancer Association	http://www.cancerindex.org/geneweb/
Cancer Program Resource Gateway	Overview on Broadinstitute data and software	https://software.broadinstitute.org/software/cprg/
CanProVar	Cancer related gene variants	http://canprovar2.zhang-lab.org/	(Li et al., 2010)
canSAR	Integrated knowledge-base on different cancer lines, genes, drugs etc	https://cansar.icr.ac.uk/	(Tym et al., 2016)
CCGA: Compendium of Cancer Genome Aberations	Genomic abnormalities in cancer	http://www.ccga.io/index.php/Main_Page	(Hodge et al., 2018)
CCGD: Candidate Cancer Gene Database	Possible cancer genes based on mouse data	http://ccgd-starrlab.oit.umn.edu/about.php	(Abbott et al., 2015)
CCLE: Cancer Cell Line Encyclopedia	Gene expression across cancer cell lines	https://portals.broadinstitute.org/ccle/	(Barretina et al., 2012)
CGAP: Cancer Genome Anatomy Project	Gene expression profiles of different cell lines and tissues (Genes, RNAi, shRNA,...)	https://cgap.nci.nih.gov/	(Strausberg, 2001)
CGC: Cancer Gene Census (COSMIC)	Genetic mutations implicated in cancer	http://cancer.sanger.ac.uk/census/	(Sondka et al., 2018)
CGP: Cancer Genome Project	Screening of cancer cell lines with drug response data (now included in COSMIC)	http://www.sanger.ac.uk/genetics/CGP/CellLines/	(Garnett et al., 2012)
CoReCG	Expression of 2056 Genes in colorectal cancer	http://lms.snu.edu.in/corecg/	(Agarwal et al., 2016)
COSMIC: Catalogue Of Somatic Mutations In Cancer	Somatic mutations in human cancer	http://cancer.sanger.ac.uk/cosmic	(Forbes et al., 2011)
CTD2: Cancer Target Discovery And Development	Collection of cancer primary data	https://ocg.cancer.gov/programs/ctd2/data-portal	(Aksoy et al., 2017)
depmap: Cancer Dependency Map	Gene expression in cancer	https://depmap.org/portal/	(Tsherniak et al., 2017)
DISEASES: Disease-gene associations mined from literature	Disease-gene associations	https://diseases.jensenlab.org/Search	(Pletscher-Frankild et al., 2015)
DriverDBv3: A database for human cancer driver gene research	Identification of driver genes in cancer	http://driverdb.tms.cmu.edu.tw/	(Cheng et al., 2014)
FANTOM	Functional ANnoTation Of the Mammalian genome	http://fantom.gsc.riken.jp/5/	(Lizio et al., 2019)
Genomics of Drug Sensitivity in Cancer	Response of cancer cell lines to different compounds (IC50 data)	http://www.cancerrxgene.org/	(Garnett et al., 2012)
HCMI: Human Cancer Models Initiative	Genomic and clinical data on cancer	https://ocg.cancer.gov/programs/HCMI	(Ledford, 2016)
ICGC: International Cancer Genome Consortium	Mutations in cancer	http://icgc.org/	(Hudson et al., 2010)
IntOGen	Drivers and cancer mutations in cancer	http://www.intogen.org/search	(Gonzalez-Perez et al., 2013)
miRCancer	microRNA Cancer Association Database	http://mircancer.ecu.edu/	(Xie et al., 2013)
Mitelman Database	Chromosome abberrations and gene fusions in cancer	https://mitelmandatabase.isb-cgc.org/
NCG6.0: Network of Cancer Genes	Information on 2372 cancer genes	http://ncg.kcl.ac.uk/	(Repana et al., 2019)
OncomiR	Expression of miRNA in cancer	http://www.oncomir.org/	(Wong et al., 2018)
PharmGKB	Cancer drug targets and genes	https://www.pharmgkb.org/	(Whirl-Carrillo et al., 2012)
TCGA: The Cancer Genome Atlas	Large cancer expression dataset with clinical data	https://cancergenome.nih.gov/	(Chang et al., 2013)
TCNG: The Cancer Network Galaxy	Inferred Cancer Gene Networks	http://tcng.hgc.jp/
TCSBN	Database of tissue and cancer-specific networks	http://inetmodels.com/	(Lee et al., 2017)
The pathology atlas	Expression data in cancer (TCGA)	http://www.proteinatlas.org/pathology	(Uhlen et al., 2017)
The Tumor Gene Family of Databases	Information on tumour genes	http://www.tumor-gene.org/
	Screening of 70 breast cancer cell lines with 90 drugs		(Daemen et al., 2013)
	Sequencing of 173 genes in 2,433 primary breast tumours		(Pereira et al., 2016)

## Sheet: Table5 Disease Genes
Name	Description	URL	References
BioMuta	disease associated single-nucleotide variations	https://hive.biochemistry.gwu.edu/biomuta/about	(Dingerdissen et al., 2018)
BioXpress	Gene-Disease Database	https://hive.biochemistry.gwu.edu/bioxpress/about	(Dingerdissen et al., 2018)
ClinVar	Genomic variation across different phenotypes	https://www.ncbi.nlm.nih.gov/clinvar/	(Landrum et al., 2016)
CTD: Comparative Toxicogenomics Database	Gene-chemical-disease database	http://ctdbase.org/	(Davis et al., 2019)
dbCRID: a database of chromosomal rearrangements in human diseases	Chromosomal rearrangements and diseases	http://c1.accurascience.com/dbCRID/	(Kong et al., 2011)
DISEASES: Disease-gene associations mined from literature	Disease-gene associations	https://diseases.jensenlab.org/Search	(Pletscher-Frankild et al., 2015)
DisGeNet	Gene-Disease Database	http://www.disgenet.org/	(Pinero et al., 2015)
eDGAR	Gene-Disease Database	http://edgar.biocomp.unibo.it/gene_disease_db/	(Babbi et al., 2017)
GAD: Genetic Association Database	Gene-Disease Database	https://geneticassociationdb.nih.gov/	(Becker et al., 2004)
GenAtlas	Gene-Phenotype database	http://genatlas.medecine.univ-paris5.fr/	(Frézal, 1999)
GTExPortal	Gene expression across tissues	https://www.gtexportal.org/home/	(Ardlie et al., 2015)
HumanNet	Human gene networks for diseases	https://www.inetbio.org/humannet/	(Hwang et al., 2019)
KEGG: Kyoto Encyclopedia of Genes and Genomes	Gene-Disease Database	https://www.genome.jp/kegg/	(Kanehisa and Goto, 2000)
MalaCards	Gene-Disease Database	http://www.malacards.org/	(Rappaport et al., 2017)
OMIM: Online Mendelian Inheritance in Man	Online Catalogue of Human Genes and Genetic Disorders	https://www.omim.org/	(Amberger et al., 2015)
SNPedia	SNPs linked to diseases	https://www.snpedia.com/	(Cariaso and Lennon, 2012)
UniProt	Protein database	www.uniprot.org/	(Consortium, 2015)

## Sheet: Table6 Essential Gene Screening
Name	Scope	URL	References
Cell Model Passport Collection	CRISPR screens from Sanger and DepMap with additional data on cell lines	https://cellmodelpassports.sanger.ac.uk/	(van der Meer et al., 2019)
DEG: Database of Essential Genes	Essential Gene Database for multiple species combining data from different sources	http://www.essentialgene.org/	(Luo et al., 2014)
DEMETER	Re-analysis of previous RNAi screenings	https://depmap.org/rnai	(Tsherniak et al., 2017)
DepMap: Cancer Dependency Map	Collection of several essential gene screenings	https://depmap.org/portal/	(Tsherniak et al., 2017)
NEST: Network Essentiality Scoring Tool	Gene essentiality based on protein interaction network and gene expression or CRISPR screen results	http://nest.dfci.harvard.edu/	(Jiang et al., 2015)
OGEE: Online GEne Essentiality	Essential genes combining data from different sources, also cancer specific	http://ogee.medgenius.info/browse/	(Chen et al., 2017)
PICKLES	50 cell lines for CRISPR and 100 cell lines for shRNA	http://pickles.hart-lab.org/	(Lenoir et al., 2018)
Project Achilles (part of DepMap)	Gene essentiality across cancer cell lines RNAi, shRNA, CRISPR/Cas9	https://portals.broadinstitute.org/achilles	(Cowley et al., 2014, Aguirre et al., 2016)
Project DRIVE	Essential genes in 398 CCLE cancer cell lines using RNAi	https://oncologynibr.shinyapps.io/drive/	(McDonald et al., 2017)
Project Score (part of DepMap)	Essential genes using CRISPR/Cas9 in 323 cell lines	https://score.depmap.sanger.ac.uk/	(Behan et al., 2019)
	324 human cancer cell lines from 30 cancer types using CRISPR/CAS9		(Winters et al., 2018)
	Essential genes based on sequence data		(Lek et al., 2016)
	Essential genes based on sequence data and mouse orthologs		(Georgi et al., 2013)
	Essential genes for BRAF inhibitor resistant melanoma cells		(Konermann et al., 2015)
	Essential genes for K562 cells using CRISPR		(Gilbert et al., 2014)
	Essential genes for oxidative phosphorylation using CRISPR/Cas9		(Arroyo et al., 2016)
	Essential genes for RNF43-mutant pancreatic ductal adenocarcinoma using CRISPR		(Steinhart et al., 2017)
	Essential genes in 14 human AML cell lines using CRISPR		(Wang et al., 2017)
	Essential genes in 324 human cancer cell lines from 30 cancer types using CRISPR		(Behan et al., 2019)
	Essential genes in 5 cancer cell lines using RNAi, shRNA and CRISPR for comparison		(Munoz et al., 2016)
	Essential genes in 58 CCLE cancer cell lines using shRNA		(Hoffman et al., 2014)
	Essential genes in 72 breast, pancreatic, and ovarian cancer cells using shRNA		(Marcotte et al., 2012)
	Essential genes in A375 and HUES62 cell lines using CRISPR		(Shalem et al., 2014)
	Essential genes in acute myeloid leukaemia cell lines and patient cell lines using RNAi and shRNA		(Zuber et al., 2011)
	Essential genes in colon and breast cancer cell lines and normal human mammary epithelial cells using shRNA		(Schlabach et al., 2008)
	Essential genes in five acute myeloid leukemia cell lines using CRISPR		(Tzelepis et al., 2016)
	Essential genes in five human cell lines using CRISPR/Cas9		(Hart et al., 2015)
	Essential genes in five human cell lines using shRNA, RNAi		(Silva et al., 2008)
	Essential genes in four Cancer cell lines using CRISPR/Cas9		(Wang et al., 2015)
	Essential genes in mouse dendritic cells using CRISPR		(Parnas et al., 2015)
	Essential genes in mouse embryonic stem cells (ESCs) using CRISPR		(Koike-Yusa et al., 2014)
	Essential genes in two Leukaemia cell lines		(Blomen et al., 2015)
	Identification of common hits across several studies		(Hart et al., 2017)
	Null mutations based on mouse orthologs and literature		(Liao and Zhang, 2008)
	Synthetic lethality screening in Ras mutant cells using shRNA, RNAi		(Luo et al., 2009)

## Sheet: Table7 Datasets
Name	Description	URL	References
100,000 Genomes Project	Analysis of more than 100000 human genomes to find genetic variants	https://www.genomicsengland.co.uk/about-genomics-england/the-100000-genomes-project/	(Wheway and Mitchison, 2019)
1KGP: 1000 Genomes Project	Analysis of 2504 human genomes to find genetic variants	https://www.internationalgenome.org/	(Auton et al., 2015, Sudmant et al., 2015)
Arrayexpress	Data Repository	https://www.ebi.ac.uk/arrayexpress/	(Kolesnikov et al., 2015)
BioGPS	Gene annotation portal with expression across different cell lines and species	http://biogps.org/	(Wu et al., 2016)
Cancer Program Resource Gateway	Overview on the Broad Institute data and software	https://software.broadinstitute.org/software/cprg/
canSAR	Integrated knowledge-base on different cancer lines, genes, drugs etc	https://cansar.icr.ac.uk/	(Tym et al., 2016)
cBioPortal for Cancer Genomics	Collection of mutations and mRNA expression on 5000 tumour samples (including TCGA data sets)	https://www.cbioportal.org/	(Cerami et al., 2012)
CCGA: Compendium of Cancer Genome Abberations	Genomic abnormalities in cancer	http://www.ccga.io/index.php/Main_Page	(Hodge et al., 2018)
CCGD: Candidate Cancer Gene Database	Possible cancer genes based on mouse data	http://ccgd-starrlab.oit.umn.edu/about.php	(Abbott et al., 2015)
CCLE: Cancer Cell Line Encyclopedia	Gene expression across cancer cell lines	https://portals.broadinstitute.org/ccle/	(Barretina et al., 2012)
CCLF: Cancer Cell Line Factory	150 patient-derived cancer cell models	https://portals.broadinstitute.org/cellfactory	(Boehm and Golub, 2015)
Cell Model Passports	Genomic data of 1600 cancer cell lines	https://cellmodelpassports.sanger.ac.uk/	(van der Meer et al., 2019)
CellMinerCDB	Integration of pharmacological and genomic analysis	https://discover.nci.nih.gov/cellminercdb/	(Rajapakse et al., 2018)
CGAP: Cancer Genome Anatomy Project	Gene expression profiles of different cell lines and tissues (Genes, RNAi, shRNA,...)	https://cgap.nci.nih.gov/	(Strausberg, 2001)
COSMIC CGC: Cancer Genome Census	Genes playing a role in cancer	http://cancer.sanger.ac.uk/census/	(Sondka et al., 2018)
COSMIC: Catalogue Of Somatic Mutations In Cancer	Genetic profiling of cancer	http://cancer.sanger.ac.uk/cosmic	(Forbes et al., 2017)
CPTAC Data Portal	Genomic, proteomic, and phosphoproteomic data with mass spectrometry	https://cptac-data-portal.georgetown.edu/	(Whiteaker et al., 2014)
CTD2: Cancer Target Discovery And Development	Collection of cancer primary data	https://ocg.cancer.gov/programs/ctd2/data-portal	(Aksoy et al., 2017)
dbGAP: database of Genotypes and Phenotypes	Associations between phenotype and genotype	https://www.ncbi.nlm.nih.gov/gap	(Mailman et al., 2007)
depmap: Cancer Dependancy Map	Gene expression in cancer	https://depmap.org/portal/	(Tsherniak et al., 2017)
EGA: European Genome-phenome Archive)	Dataset storage for genetic data	https://www.ega-archive.org/	(Lappalainen et al., 2015)
GDSC: Genomics of Drug Sensitivity in Cancer	Drug response data and drug sensitivity in cancer	https://www.cancerrxgene.org/	(Yang et al., 2013)
Genomic Data Commons Data Portal	Collection of different cancer datasets	https://portal.gdc.cancer.gov/	(Grossman et al., 2016)
GTExPortal	Gene expression across tissues	https://www.gtexportal.org/home/	(Ardlie et al., 2015)
HapMap Project	Create a map of the human haplotype	https://www.genome.gov/10001688/international-hapmap-project	(Altshuler et al., 2010)
Harmonizome	Gene expression across datasets and tissues	http://amp.pharm.mssm.edu/Harmonizome/	(Rouillard et al., 2016)
HCMD: Human Cancer Metastasis Database	Expression data of cancer metastasis from GEO and TCGA	http://hcmdb.i-sanger.com/index	(Zheng et al., 2018)
HCMI: Human Cancer Models Initiative	Genomic and clinical data on cancer	https://ocg.cancer.gov/programs/HCMI	(Ledford, 2016)
HGP: Human Genome Project	Determine the human genome	https://www.genome.gov/human-genome-project	(Lander et al., 2001)
ICGC: International Cancer Genome Consortium	Mutations in cancer	http://icgc.org/	(Hudson et al., 2010)
MET500 metastatic cancer cohort	Whole-exome and -transcriptome sequencing of 500 adult patients with metastatic solid tumours	https://met500.path.med.umich.edu/	(Robinson et al., 2017)
Metabric: Molecular Taxonomy of Breast Cancer International Consortium	20000 breast cancer tumours	https://www.ebi.ac.uk/ega/studies/EGAS00000000083	(Curtis et al., 2012)
NCBI GEO	Public genomic data repository	https://www.ncbi.nlm.nih.gov/geo/	(Barrett et al., 2013)
Oncomime	Microarray database	https://www.oncomine.org/	(Rhodes et al., 2004)
TCGA: The Cancer Genome Atlas	Large cancer expression dataset with clinical data	https://cancergenome.nih.gov/	(Chang et al., 2013)
TCPA: The Cancer Proteome Atlas	Functional proteomics on TCGA data	https://tcpaportal.org/tcpa/	(Li et al., 2013)
The pathology atlas	Expression data in 17 cancer types with Kaplan-Meier plots	http://www.proteinatlas.org/pathology	(Uhlen et al., 2017)
